# Supplementary material for: AHNAK Contributes to Hepatocellular Carcinoma Growth by Interacting with IGF-1R
Source: MDPI journal article supplement (doi:10.3390/molecules27248680), 2022-12-08

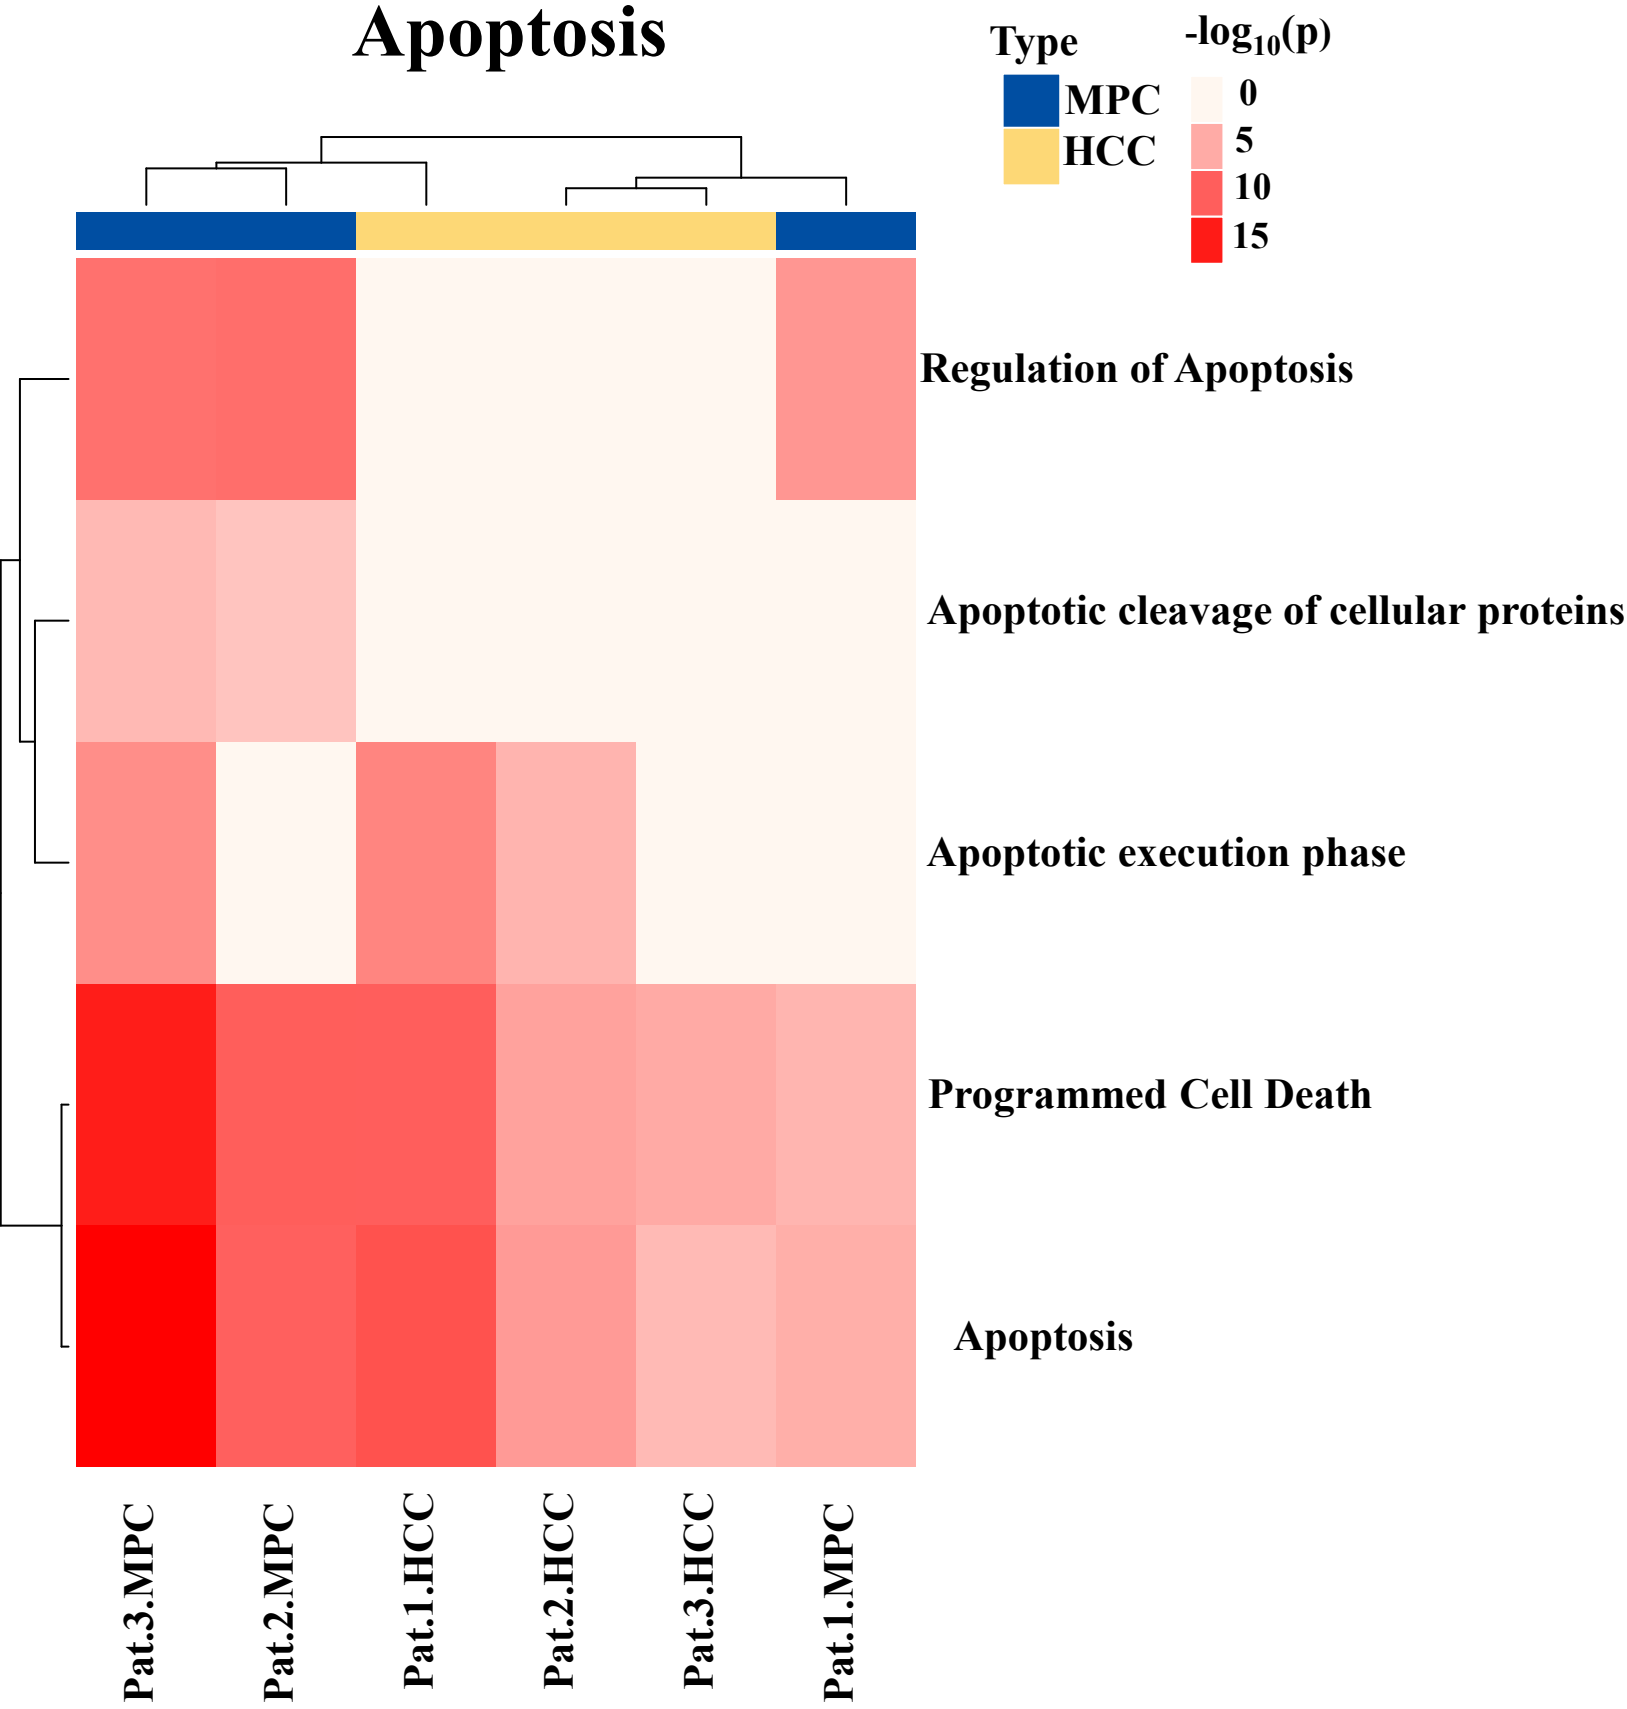

Cellular response to stress

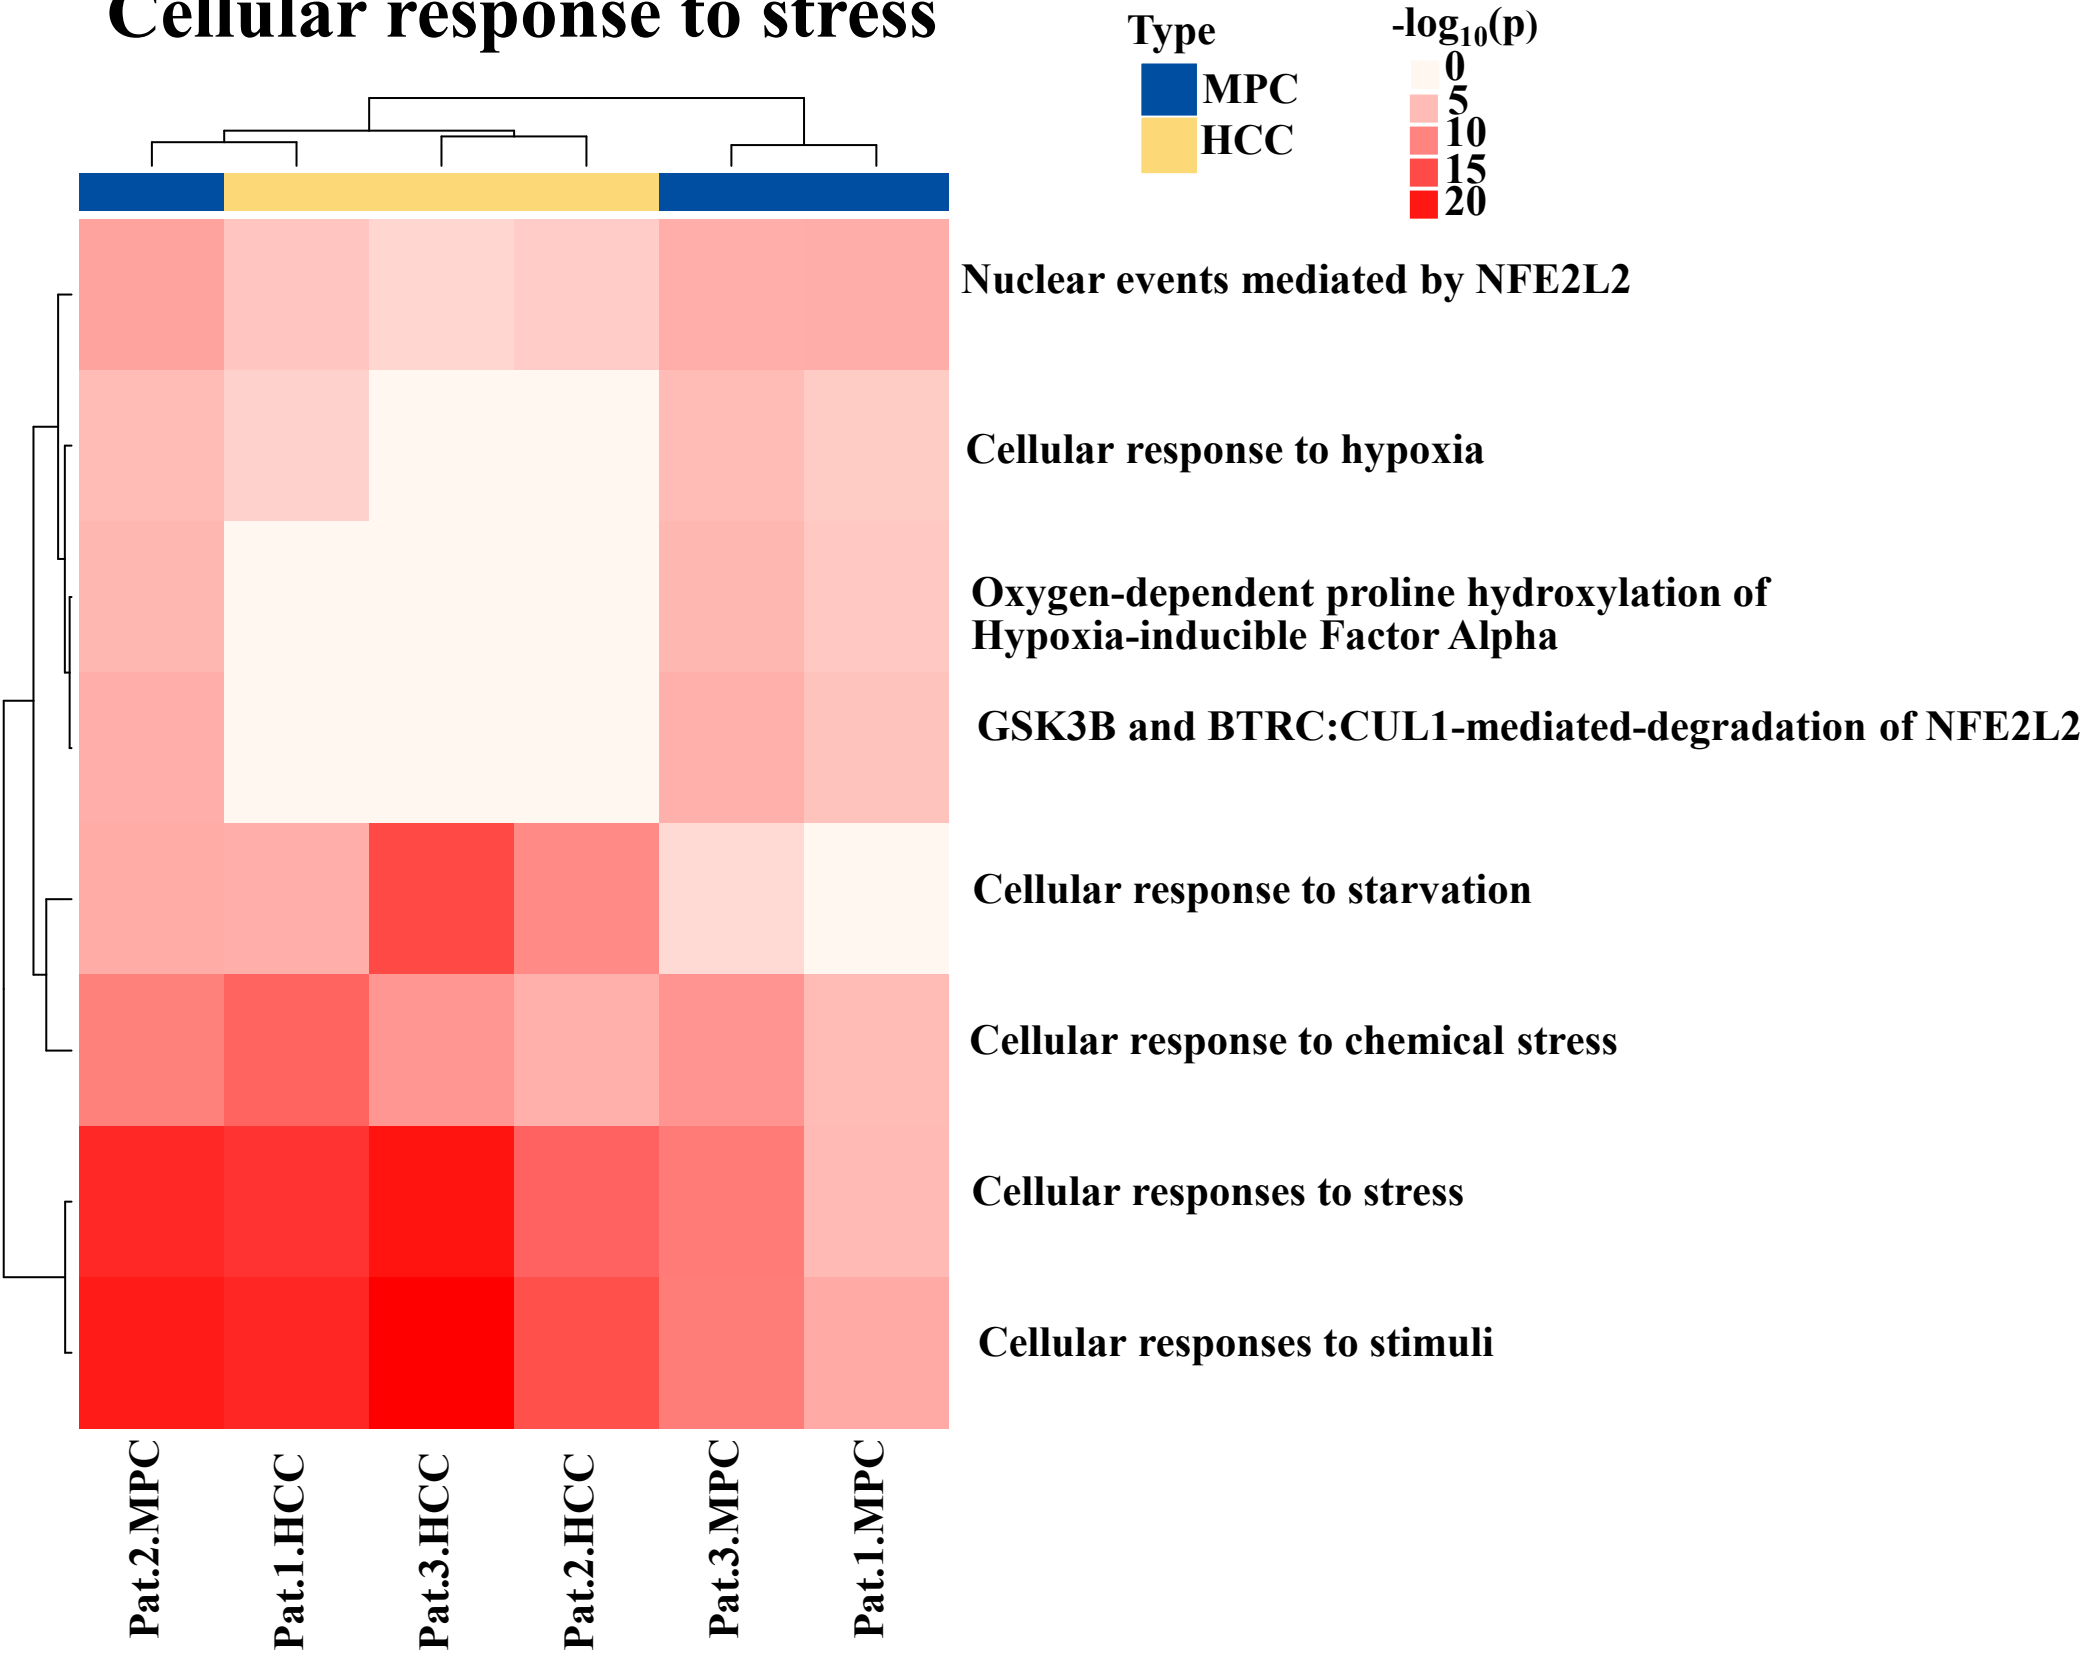

# Transport of protein and small molecules

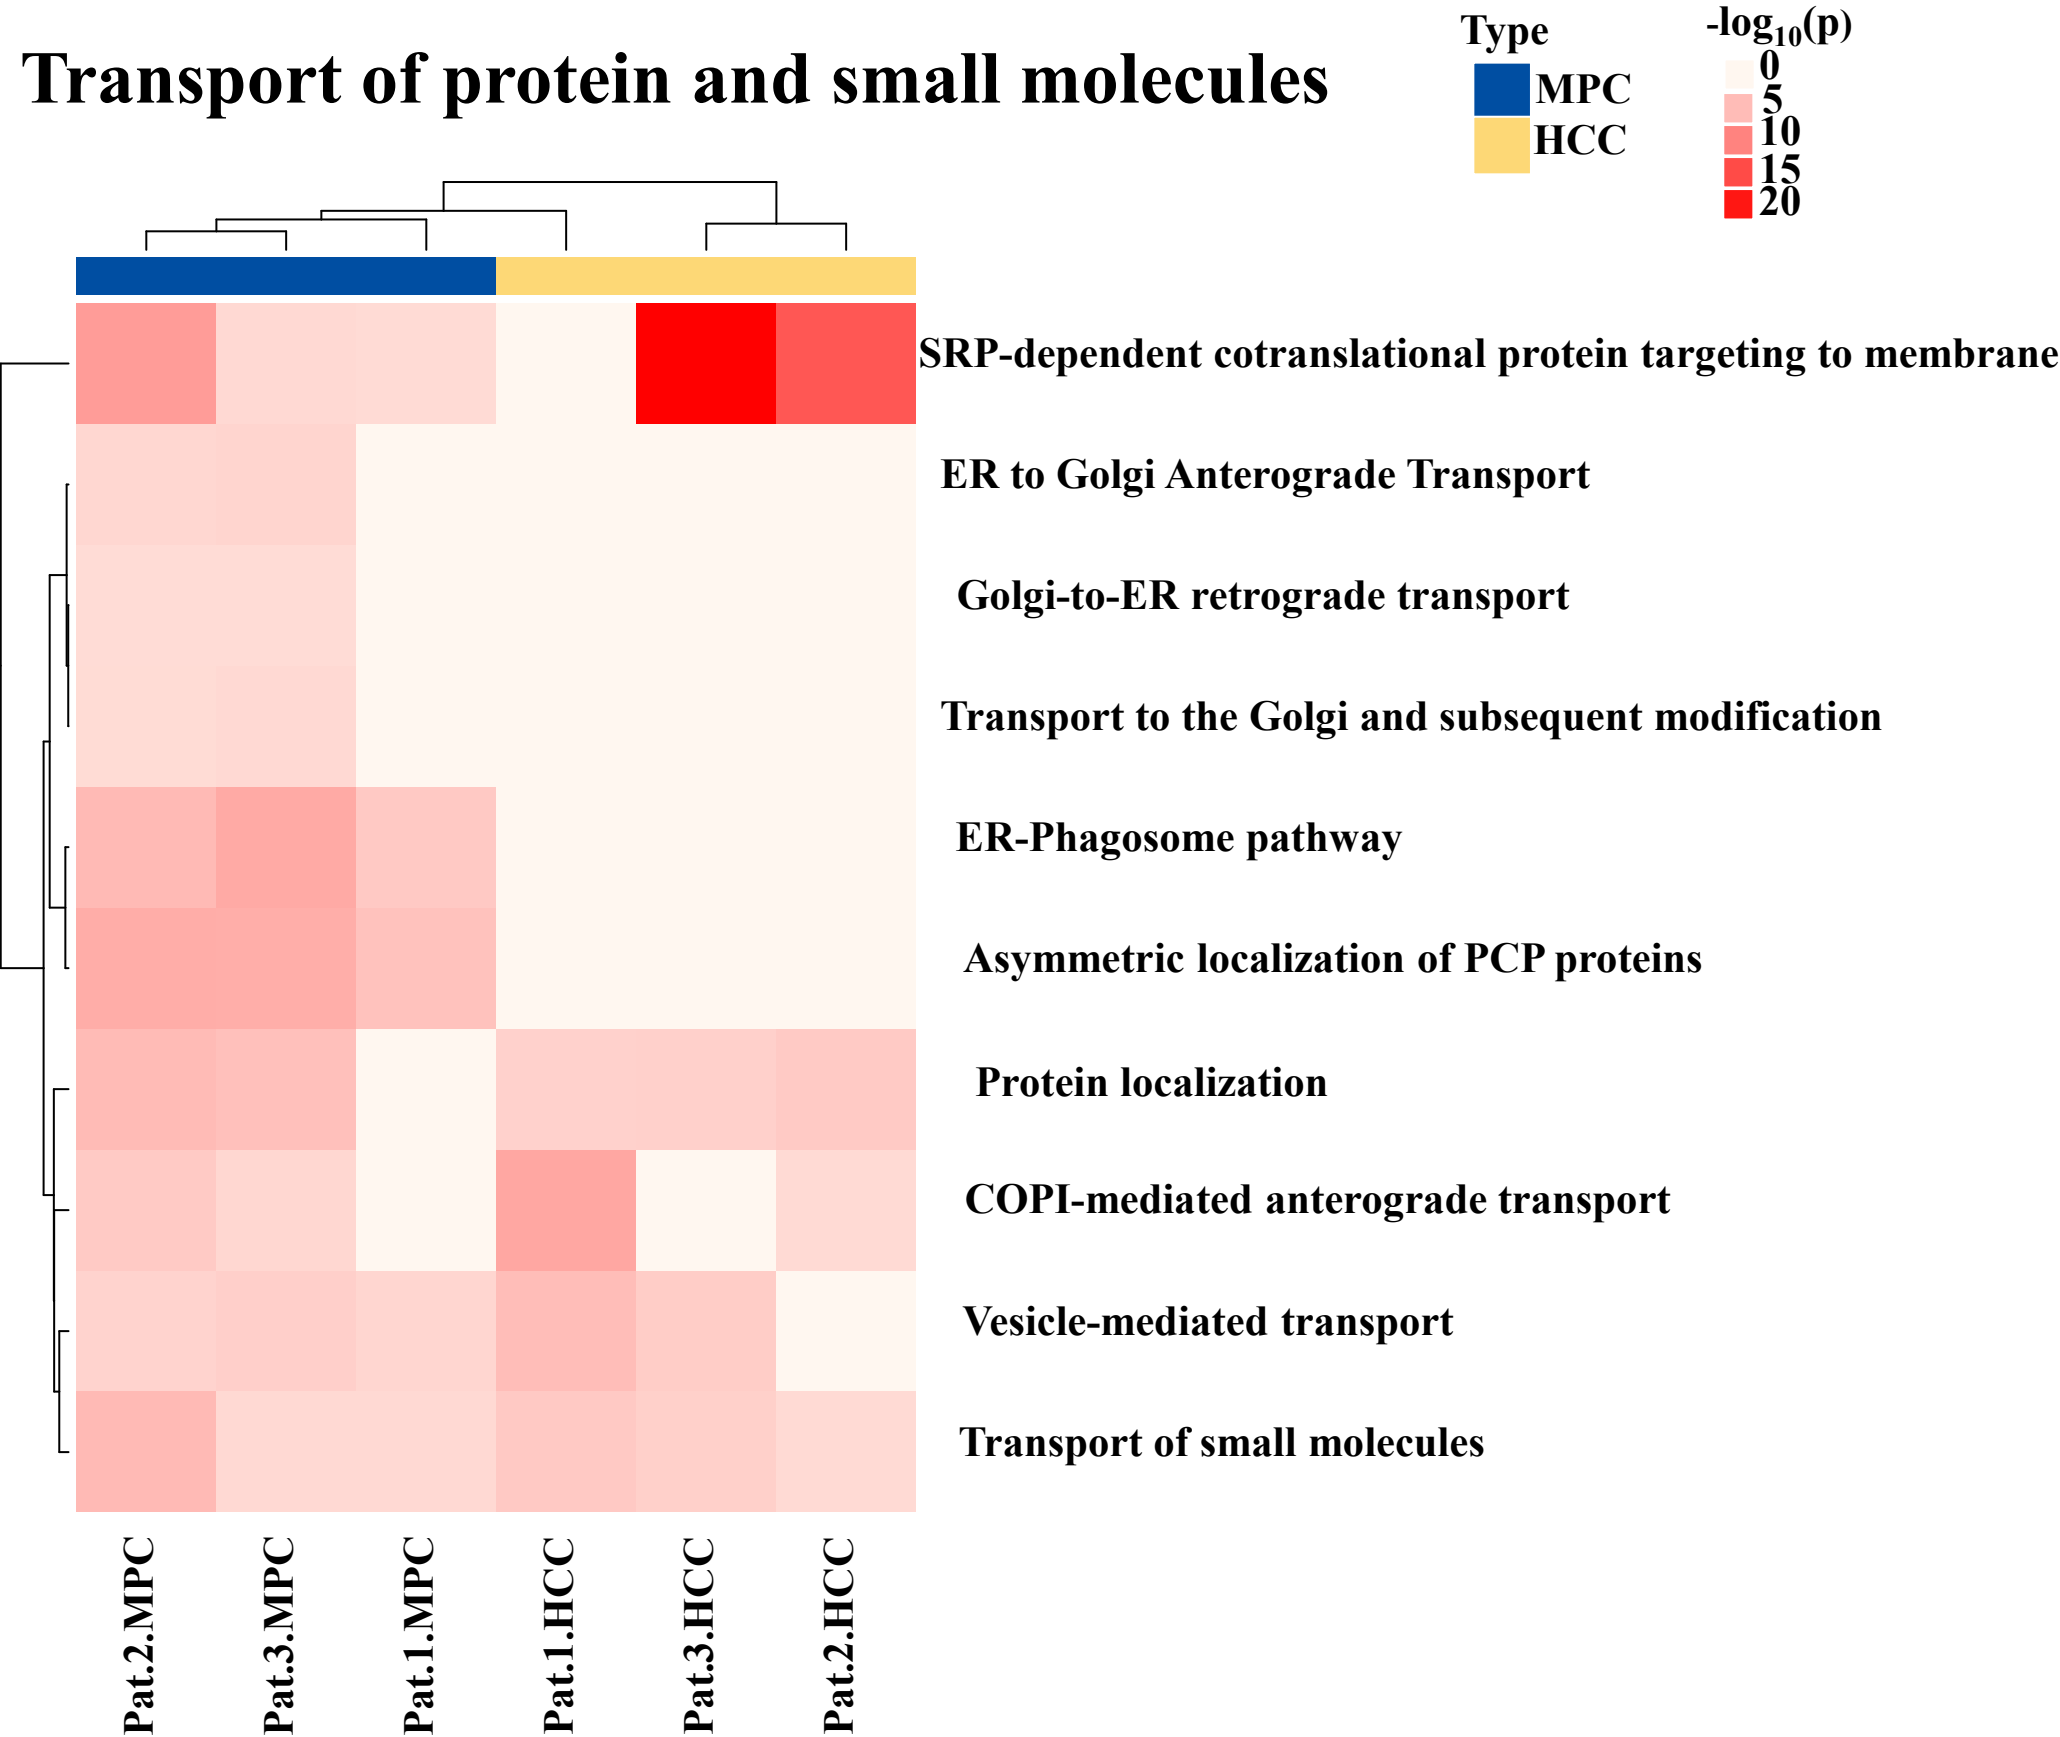

# Metabolism of biomacromolecule

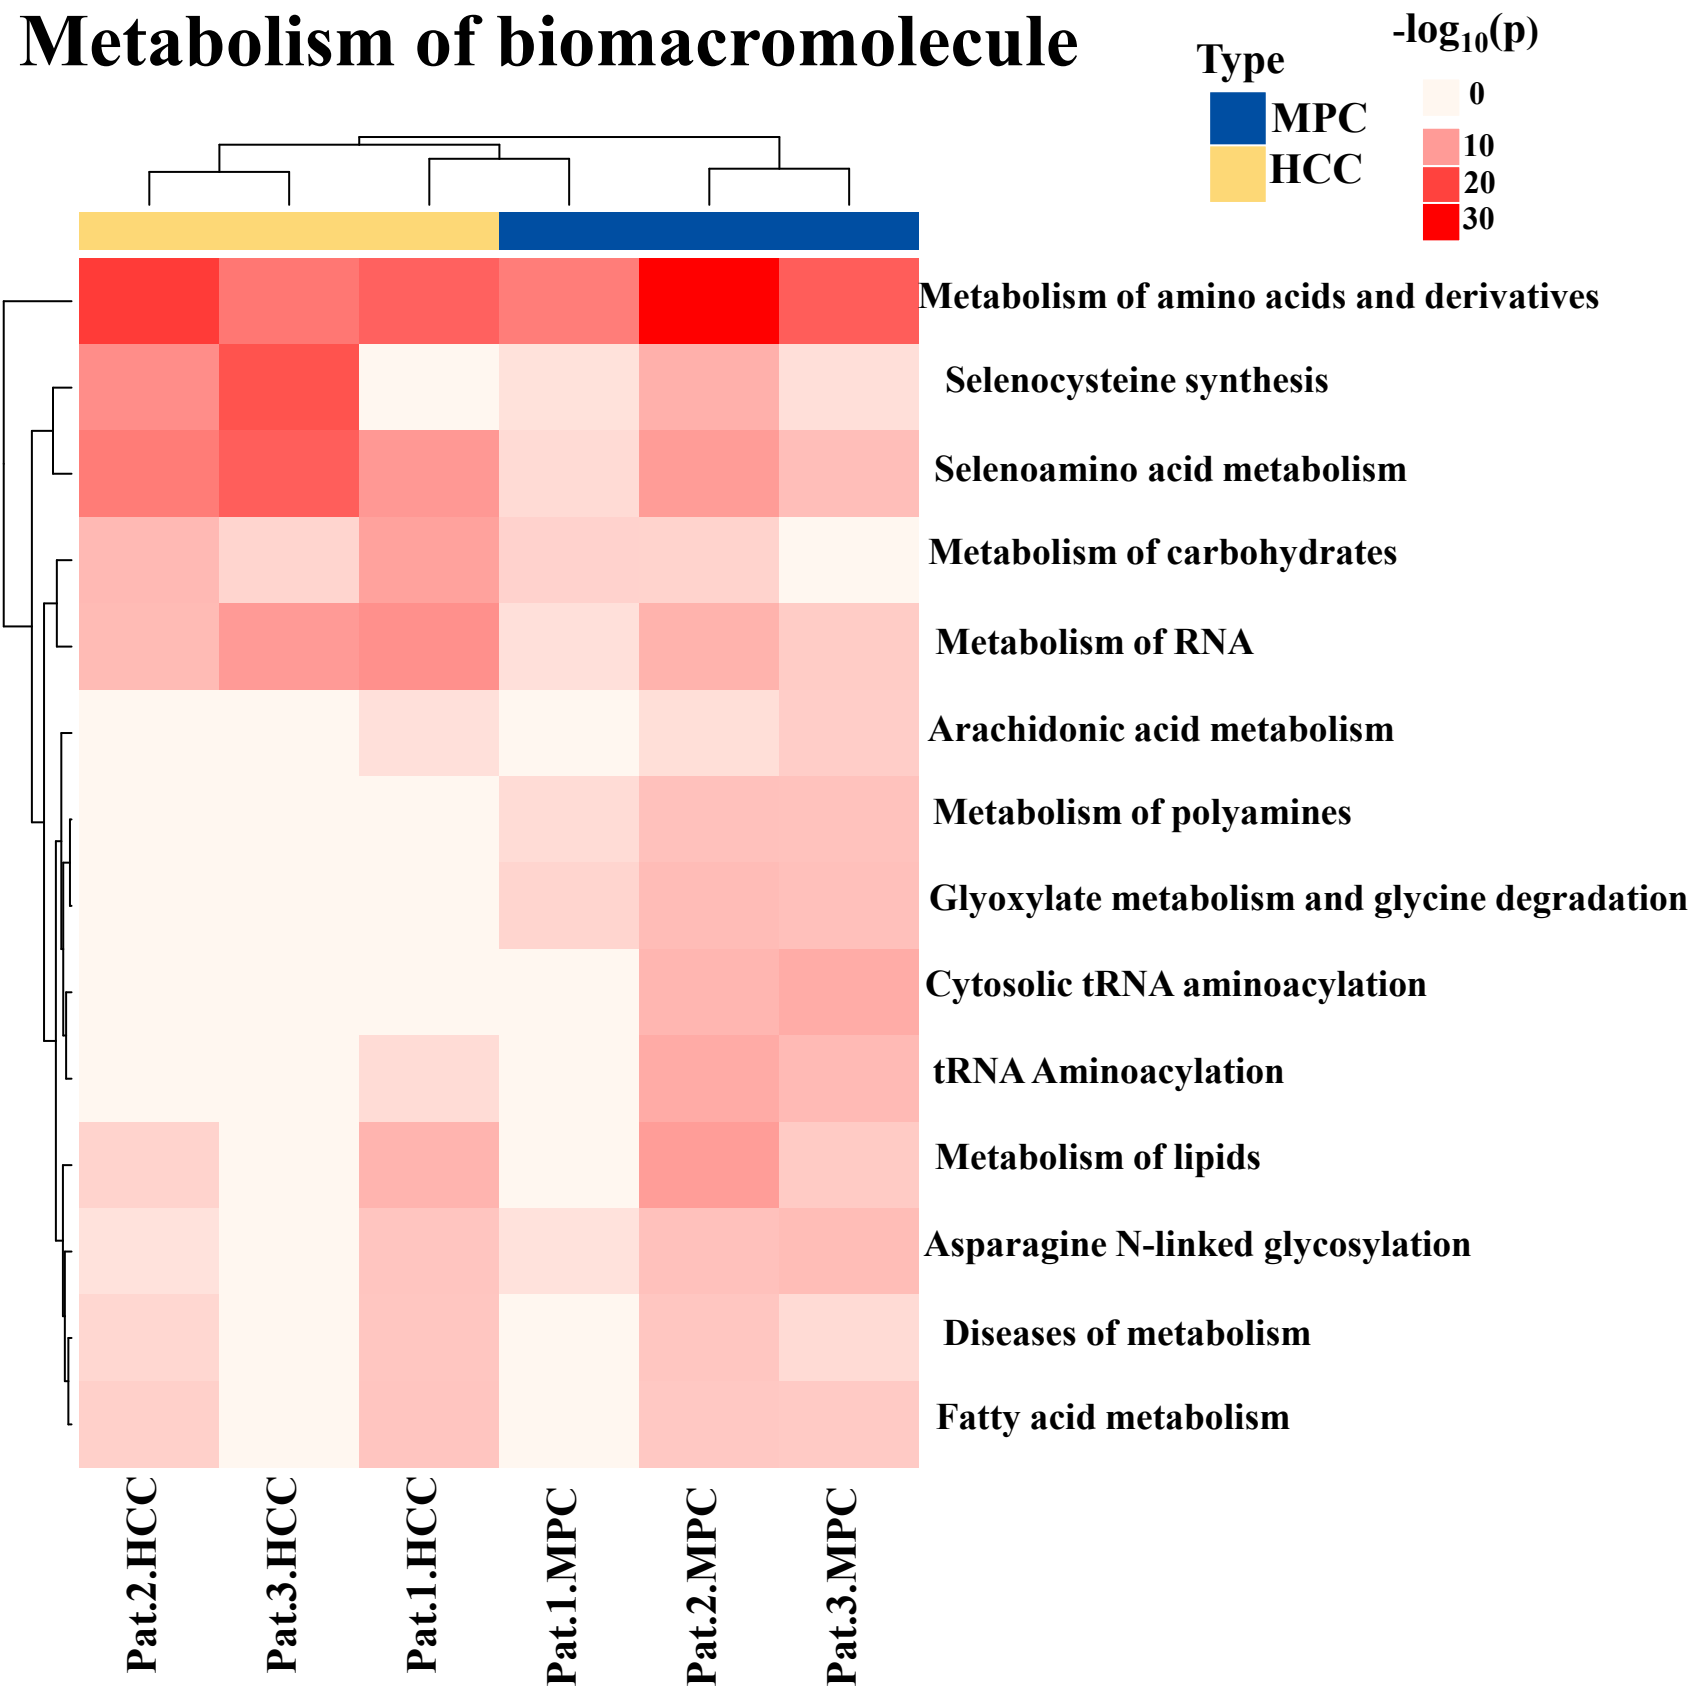

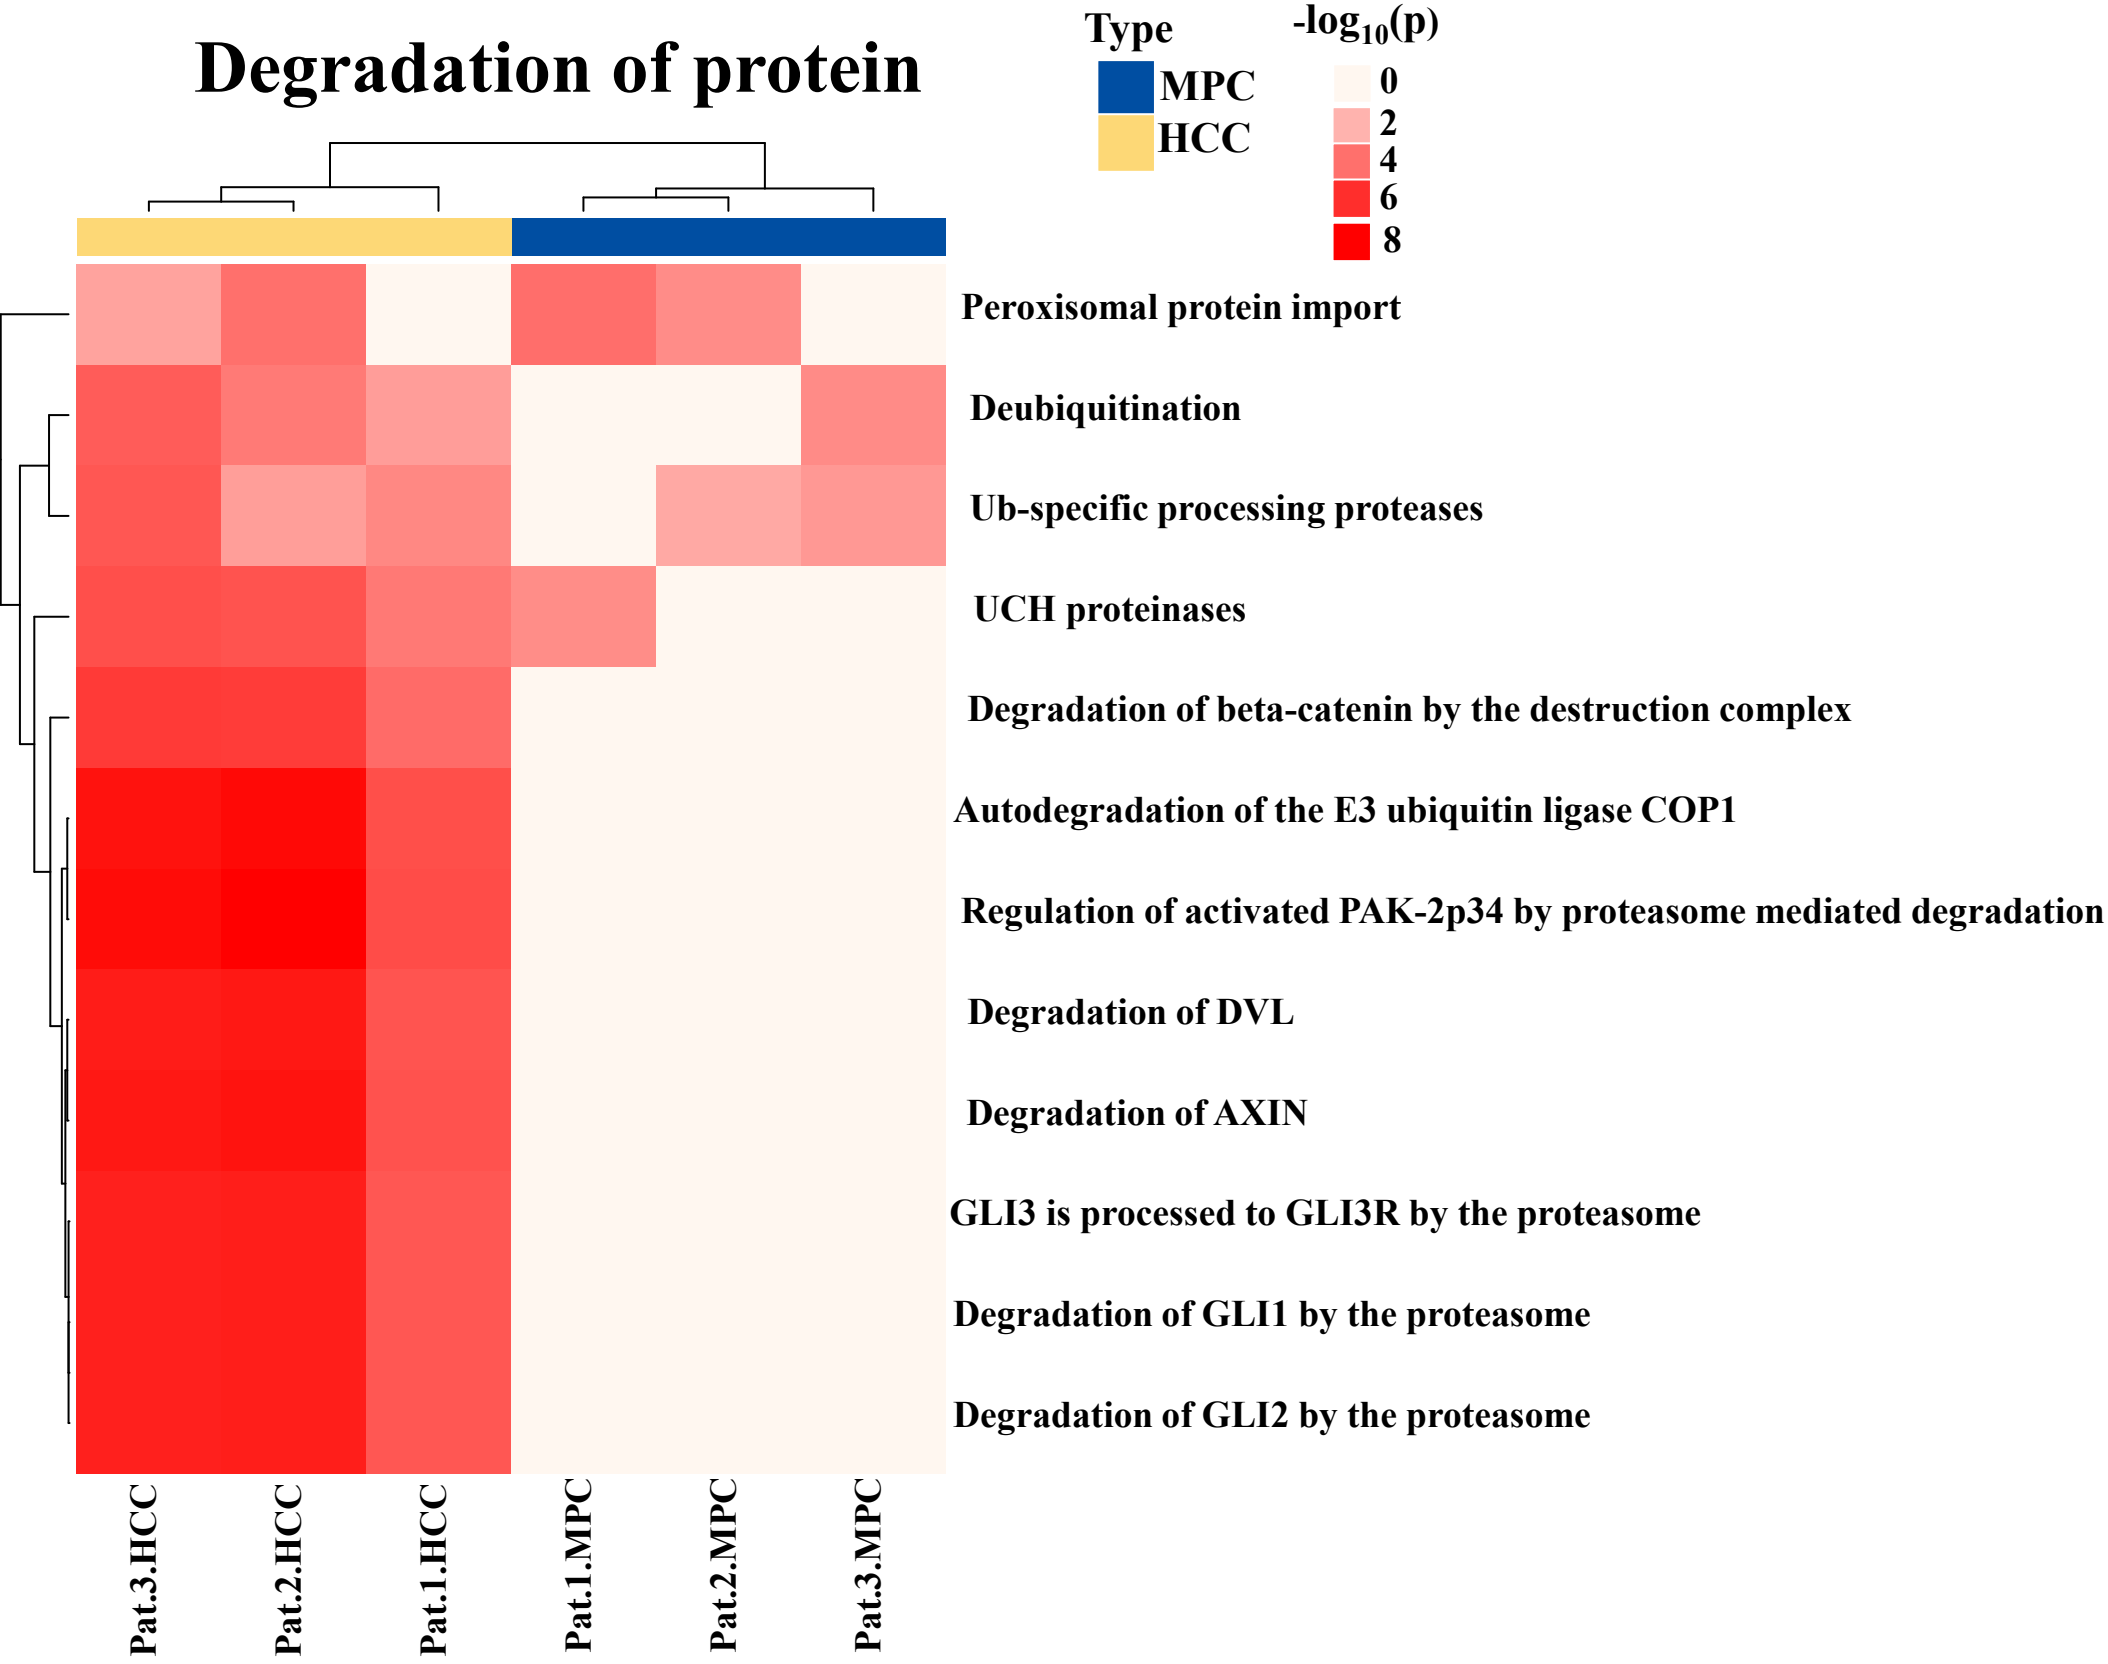

# Immune response

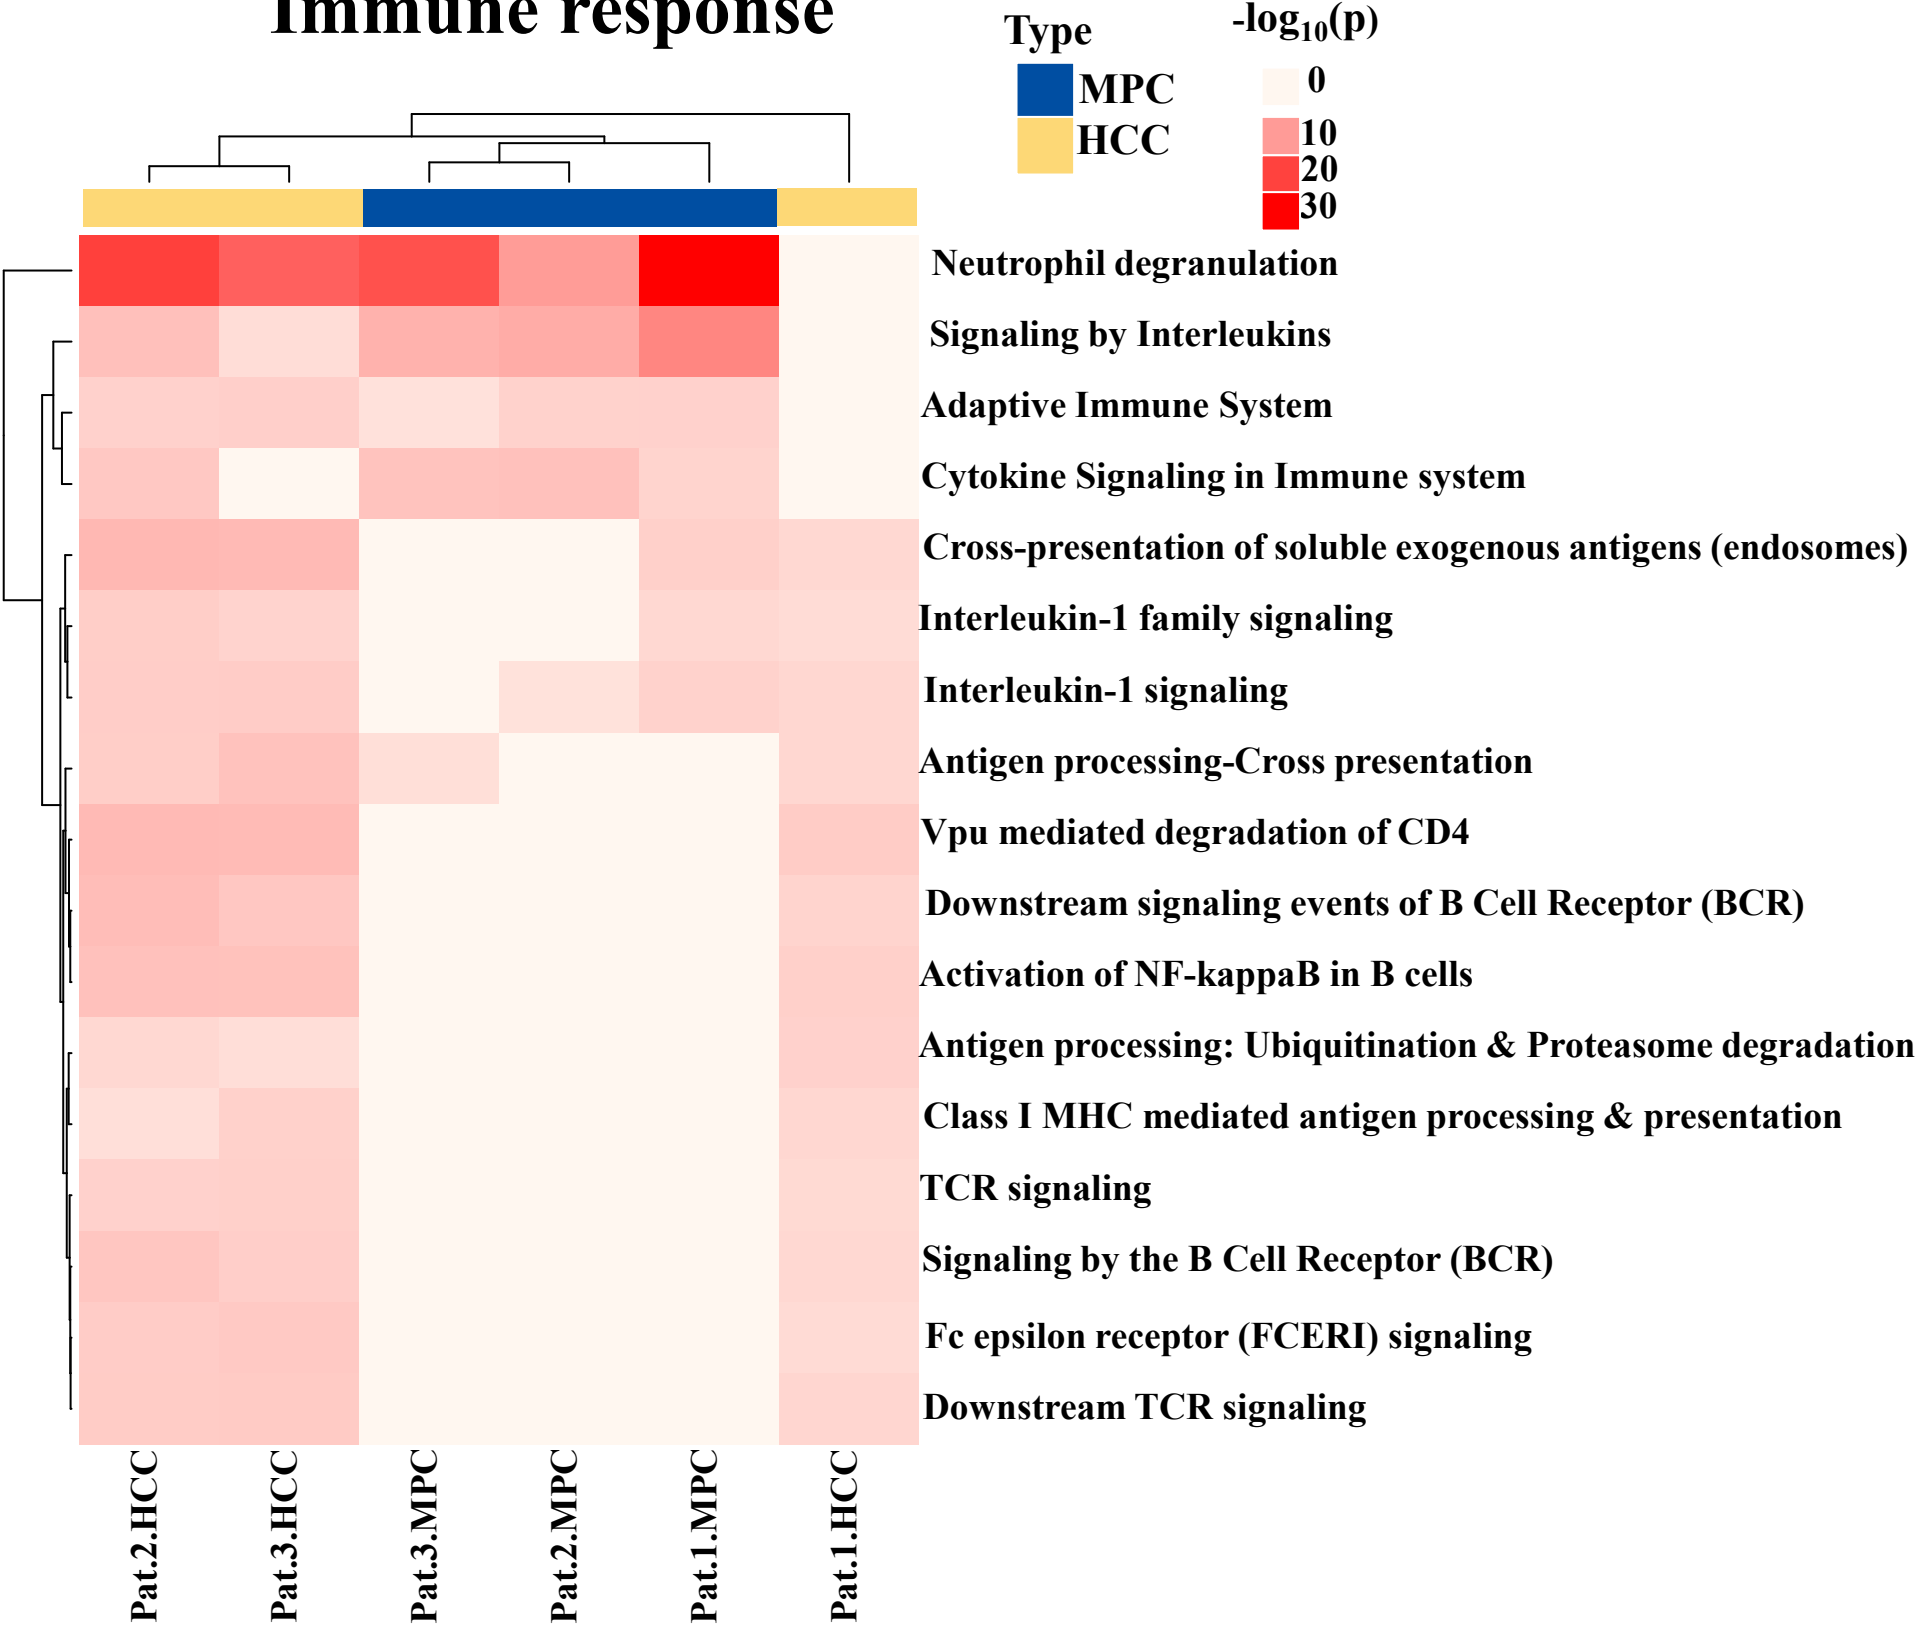

Supplement: s1 [file s1]
