# Supplementary figures and images for: AHNAK Contributes to Hepatocellular Carcinoma Growth by Interacting with IGF-1R
Source: MDPI journal article supplement (doi:10.3390/molecules27248680), 2022-12-08

## Pat.2 paracancerous tissues, anti-IgG

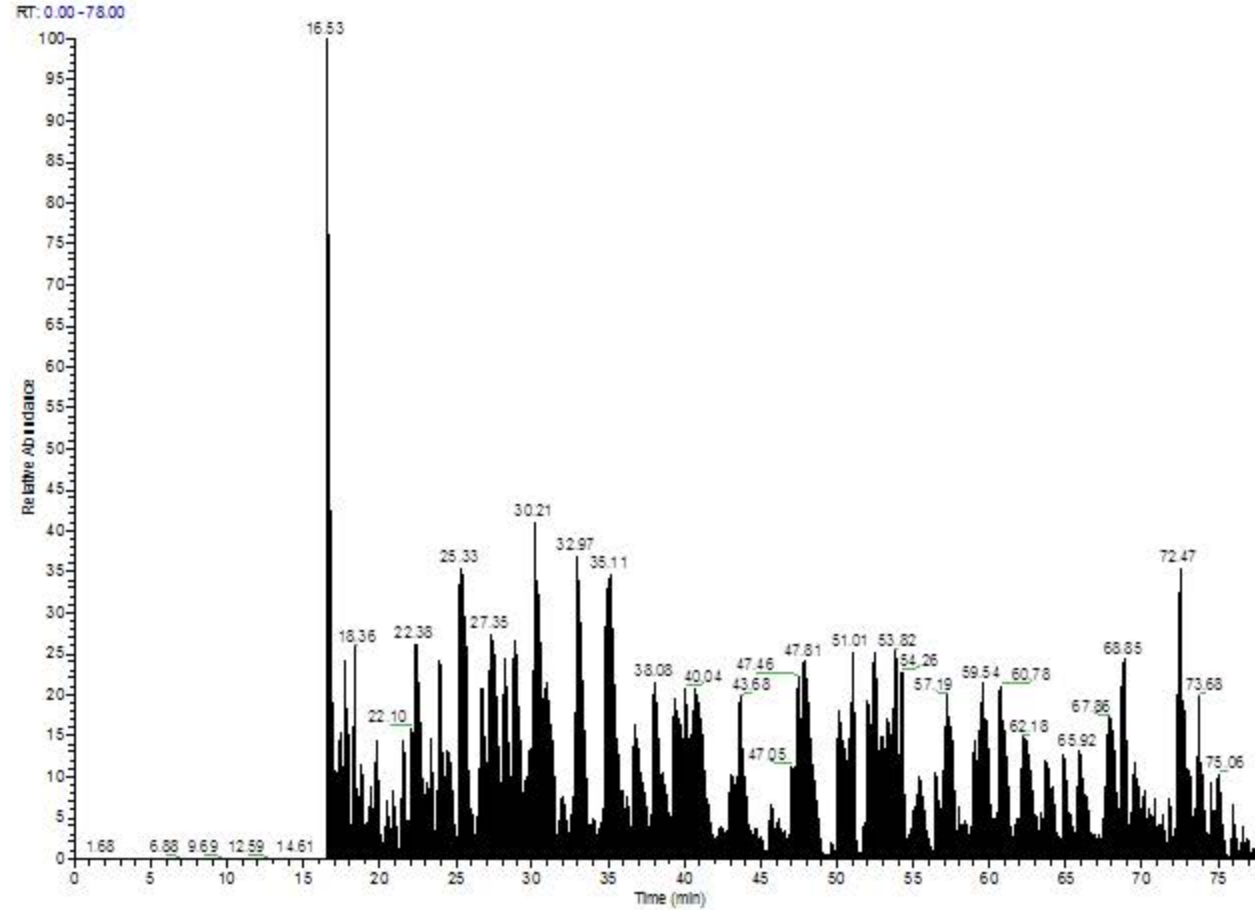

Supplement: s1 [file s1]

# Pat.2 HCC tissue, anti-AHNAK

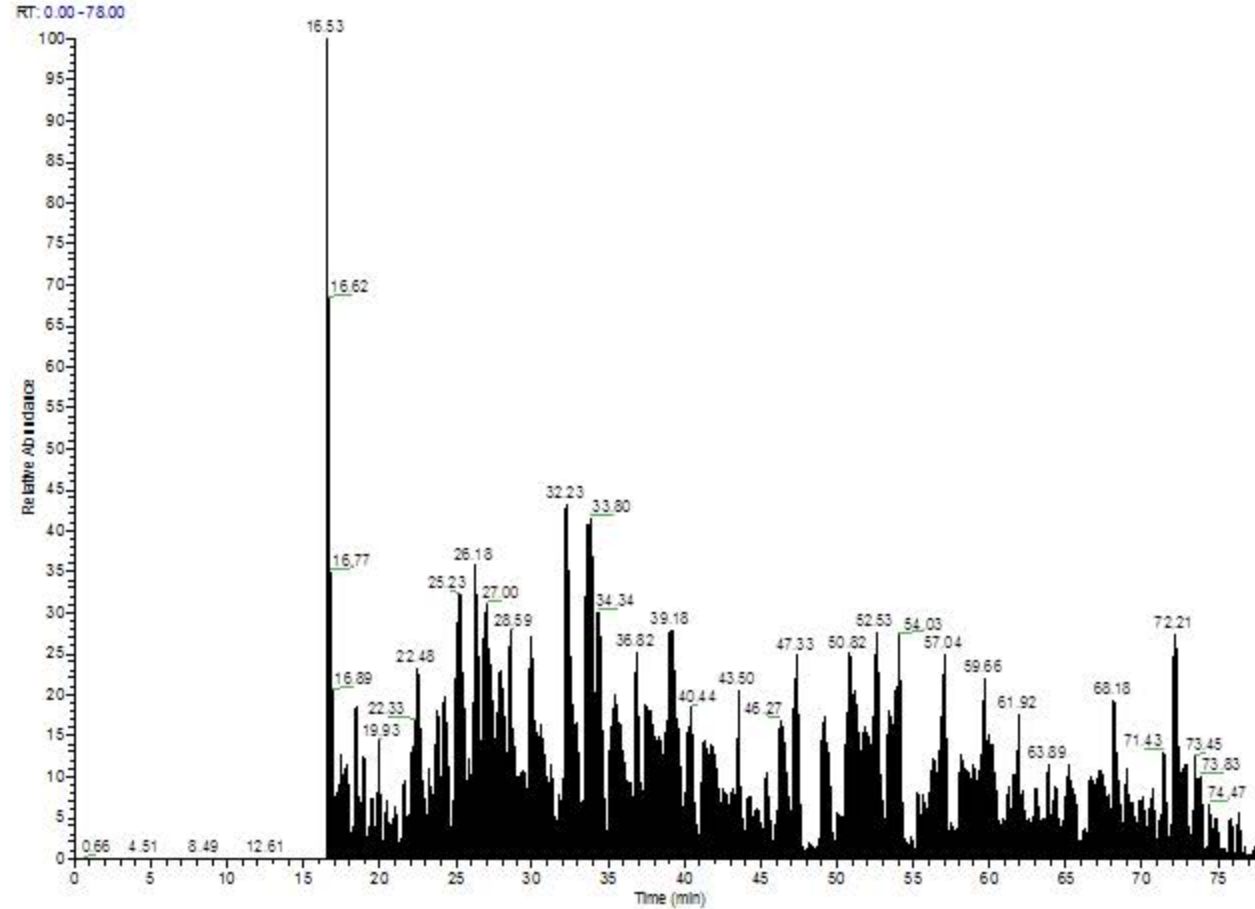

Supplement: s1 [file s1]

# Pat.1 paracancerous tissues, anti-AHNAK

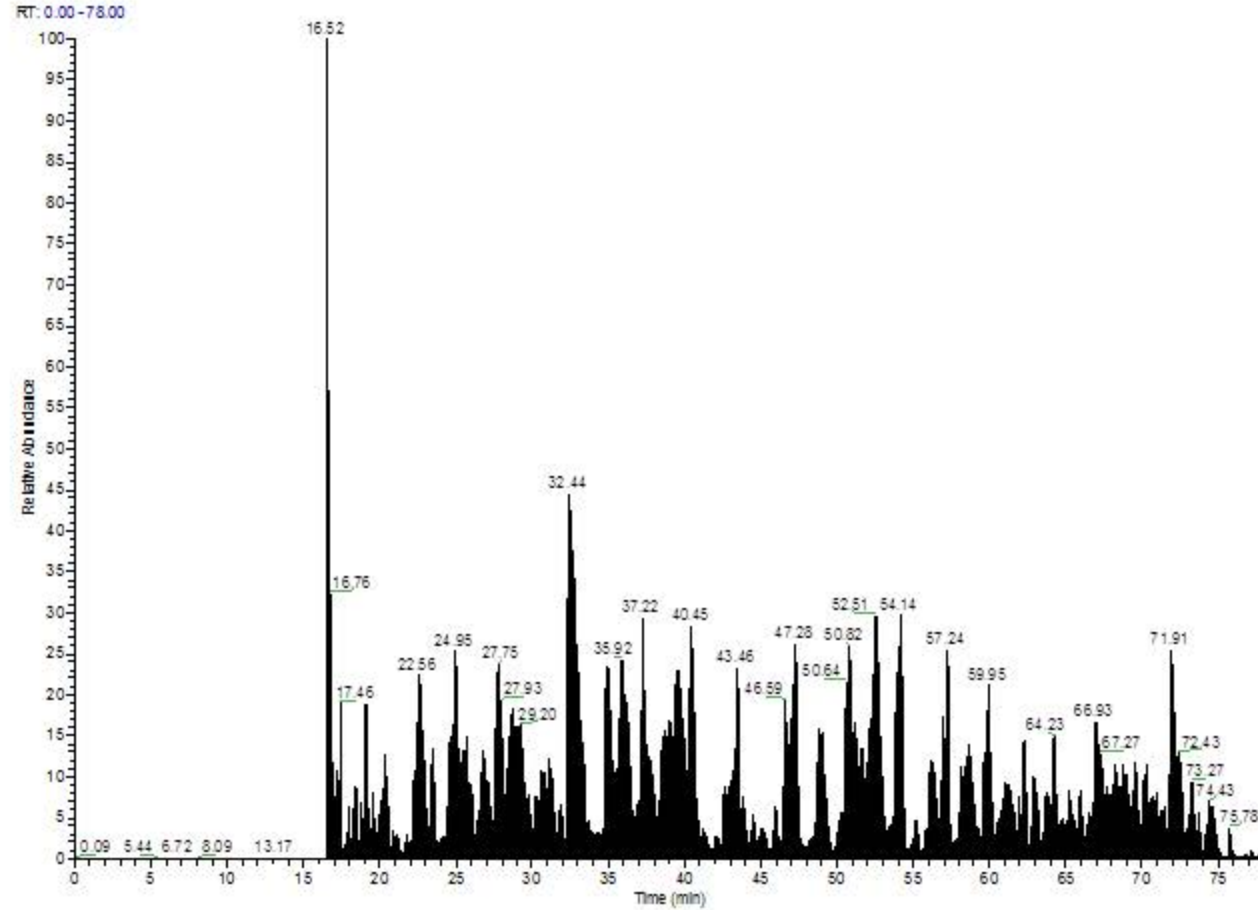

Supplement: s1 [file s1]

# Pat.3 HCC tissue, anti-AHNAK

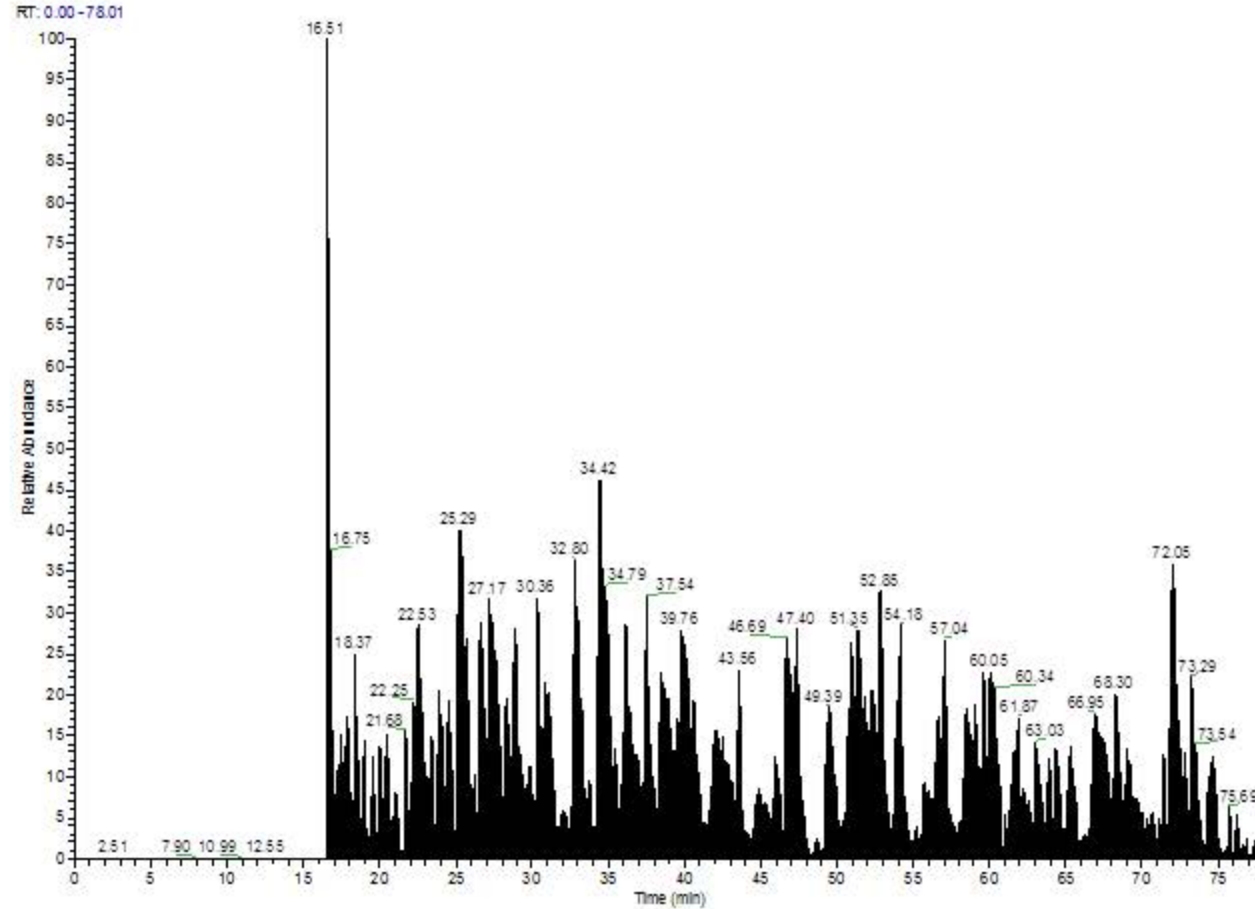

Supplement: s1 [file s1]

## Pat.2 paracancerous tissues, anti-AHNAK

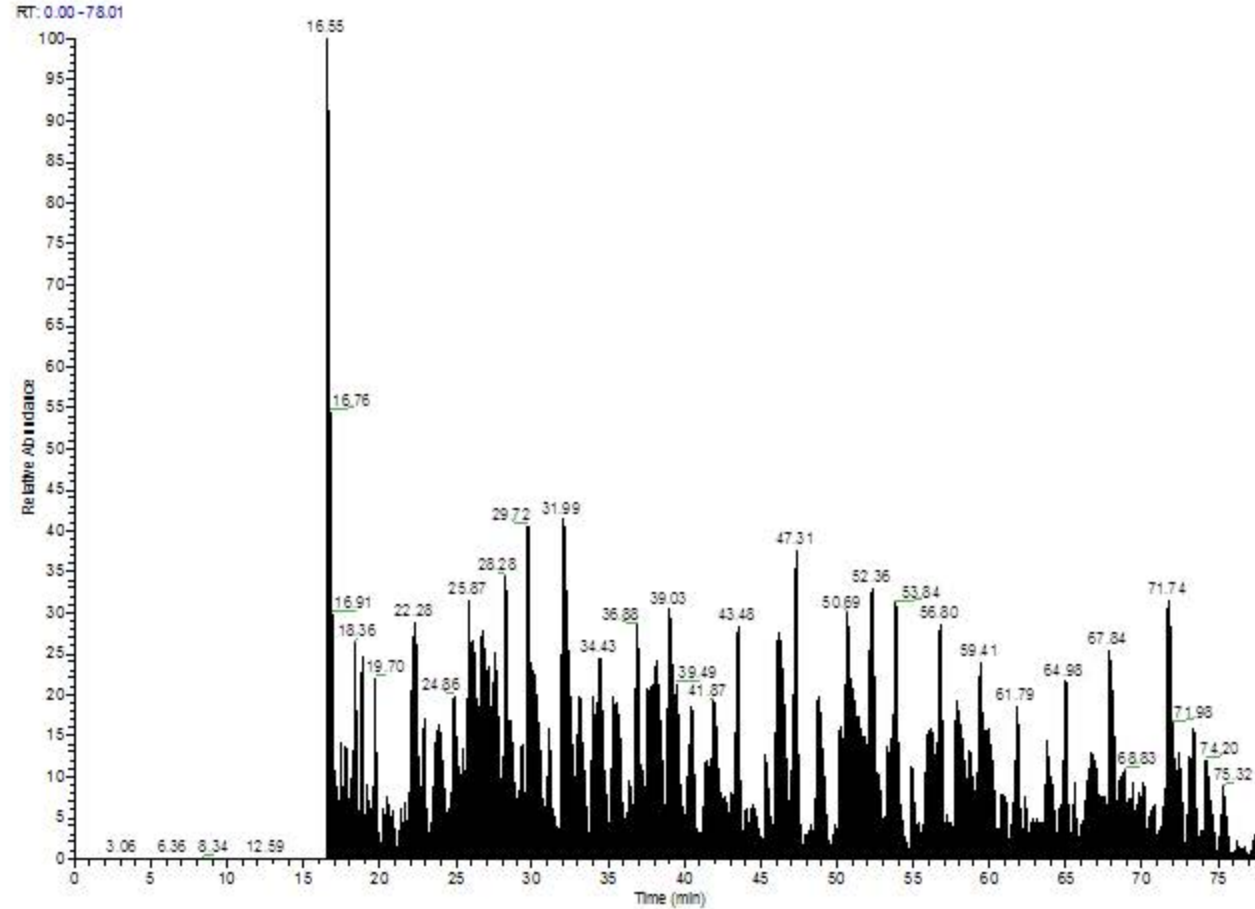

Supplement: s1 [file s1]

# Pat.3 HCC tissue, anti-IgG

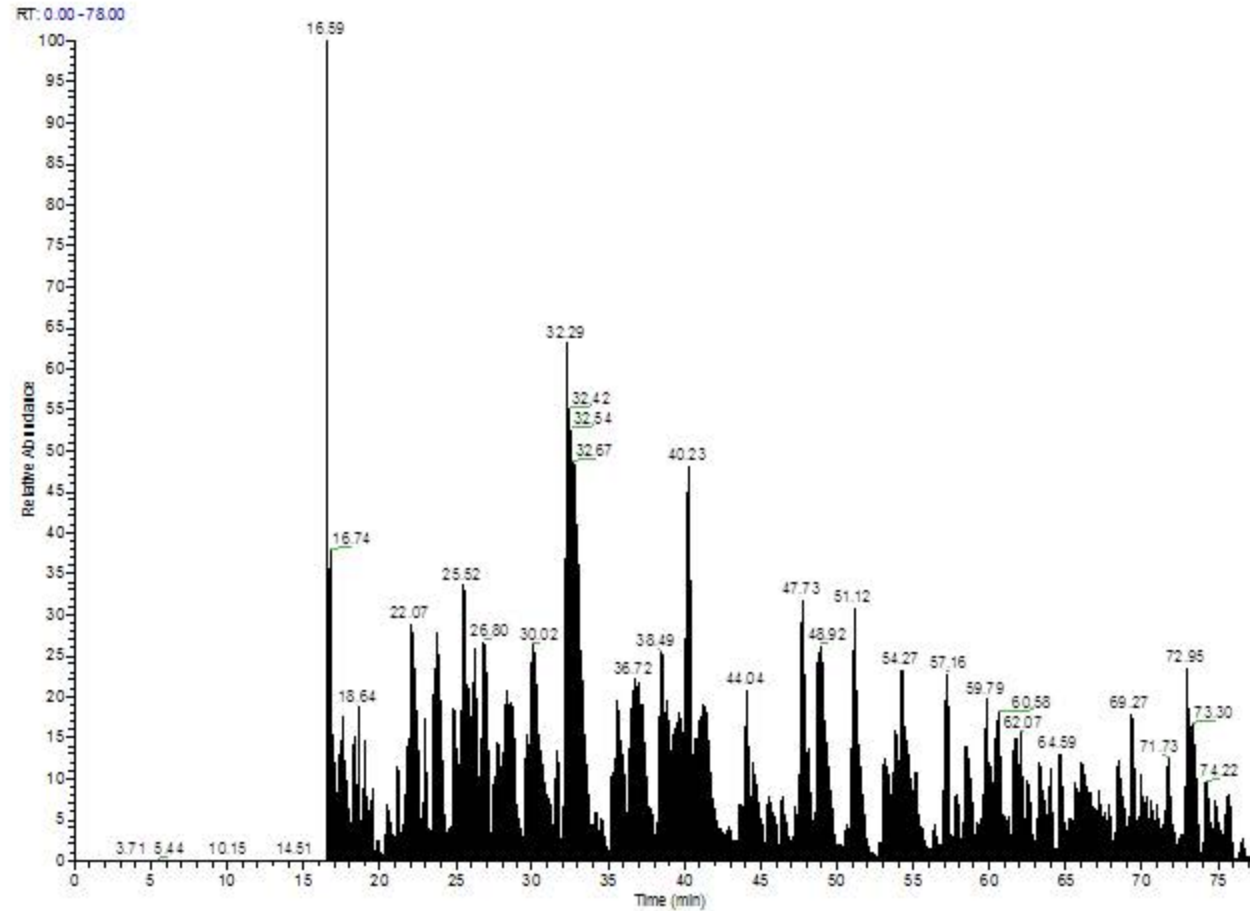

Supplement: s1 [file s1]

# Pat.3 paracancerous tissues, anti-AHNAK

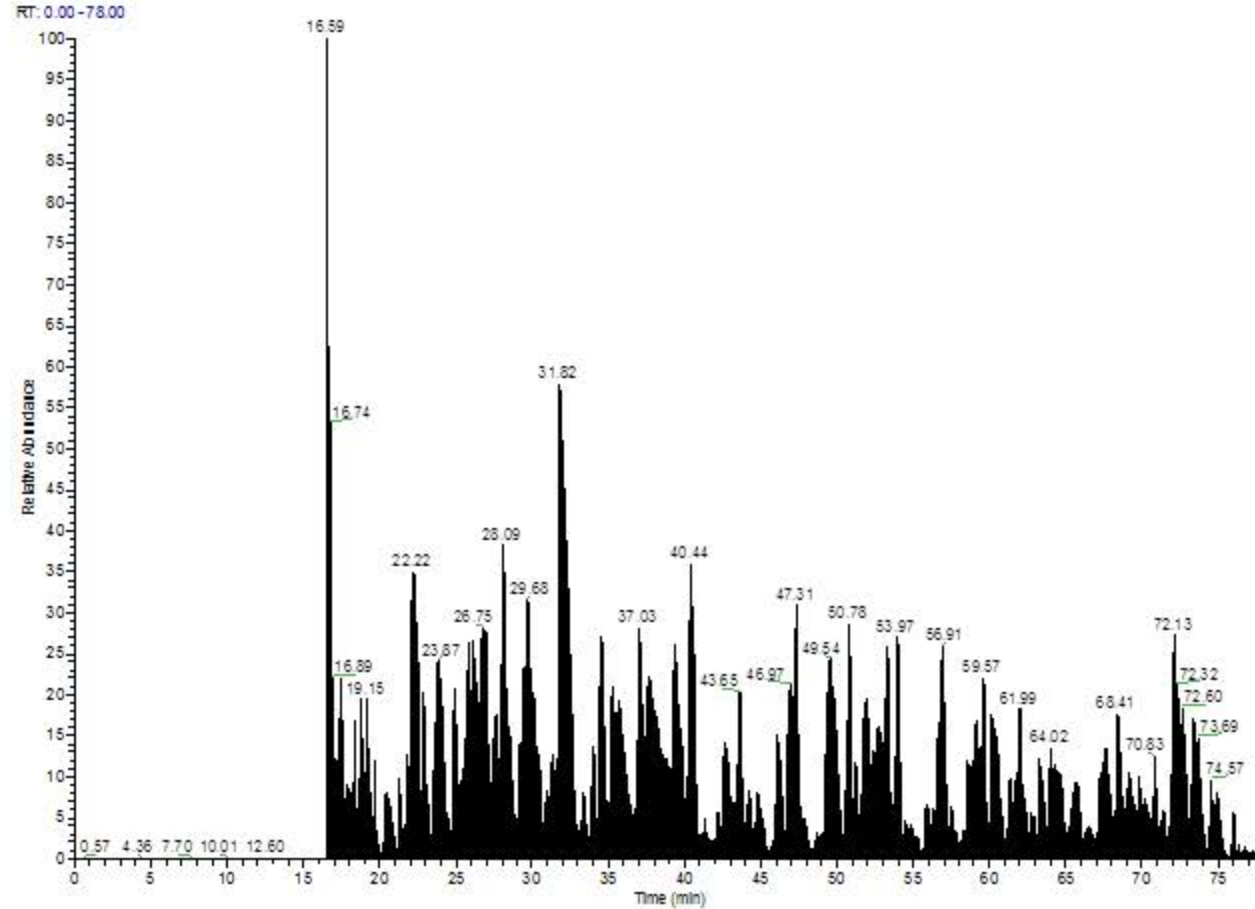

Supplement: s1 [file s1]

# Pat.1 HCC tissue, anti-IgG

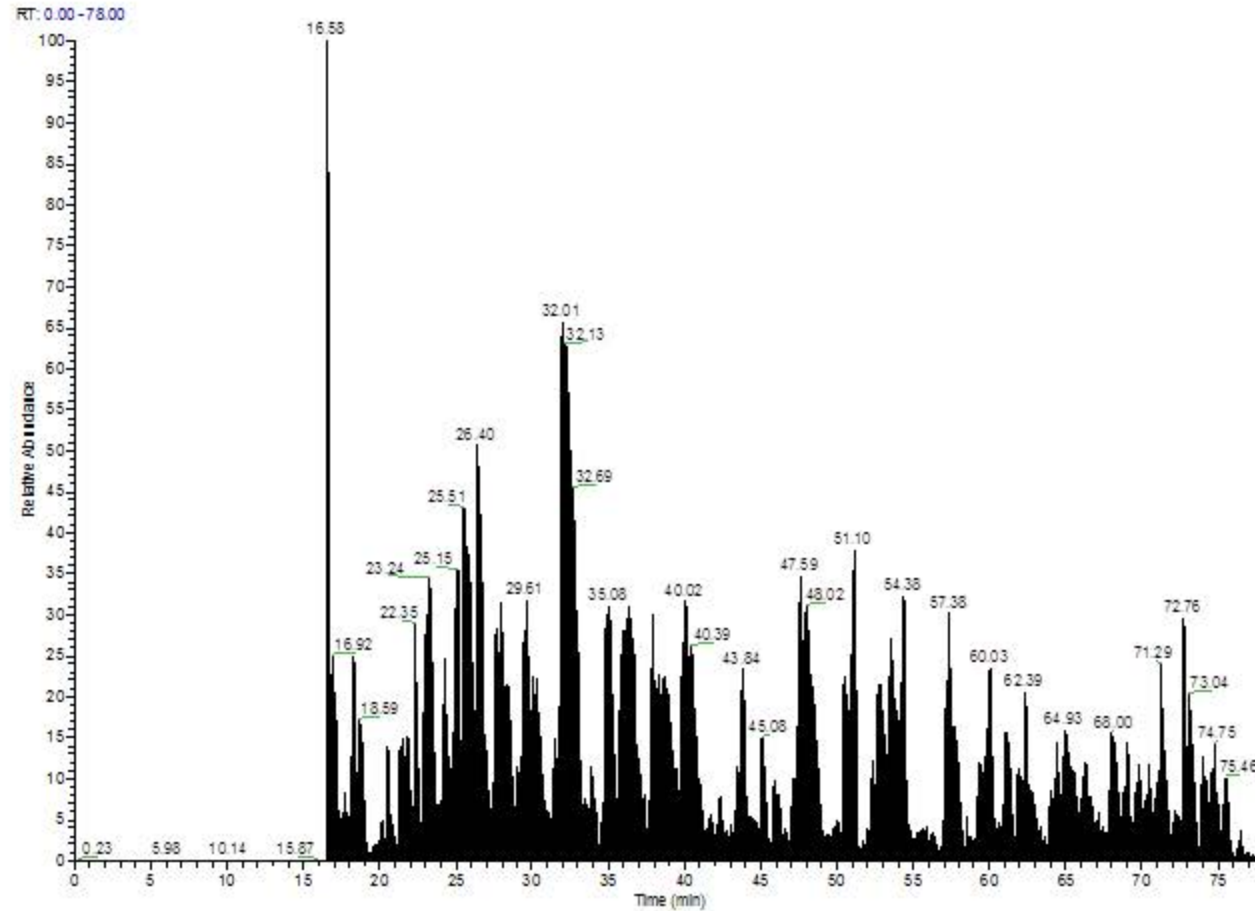

Supplement: s1 [file s1]

## Pat.2 HCC tissue, anti-IgG

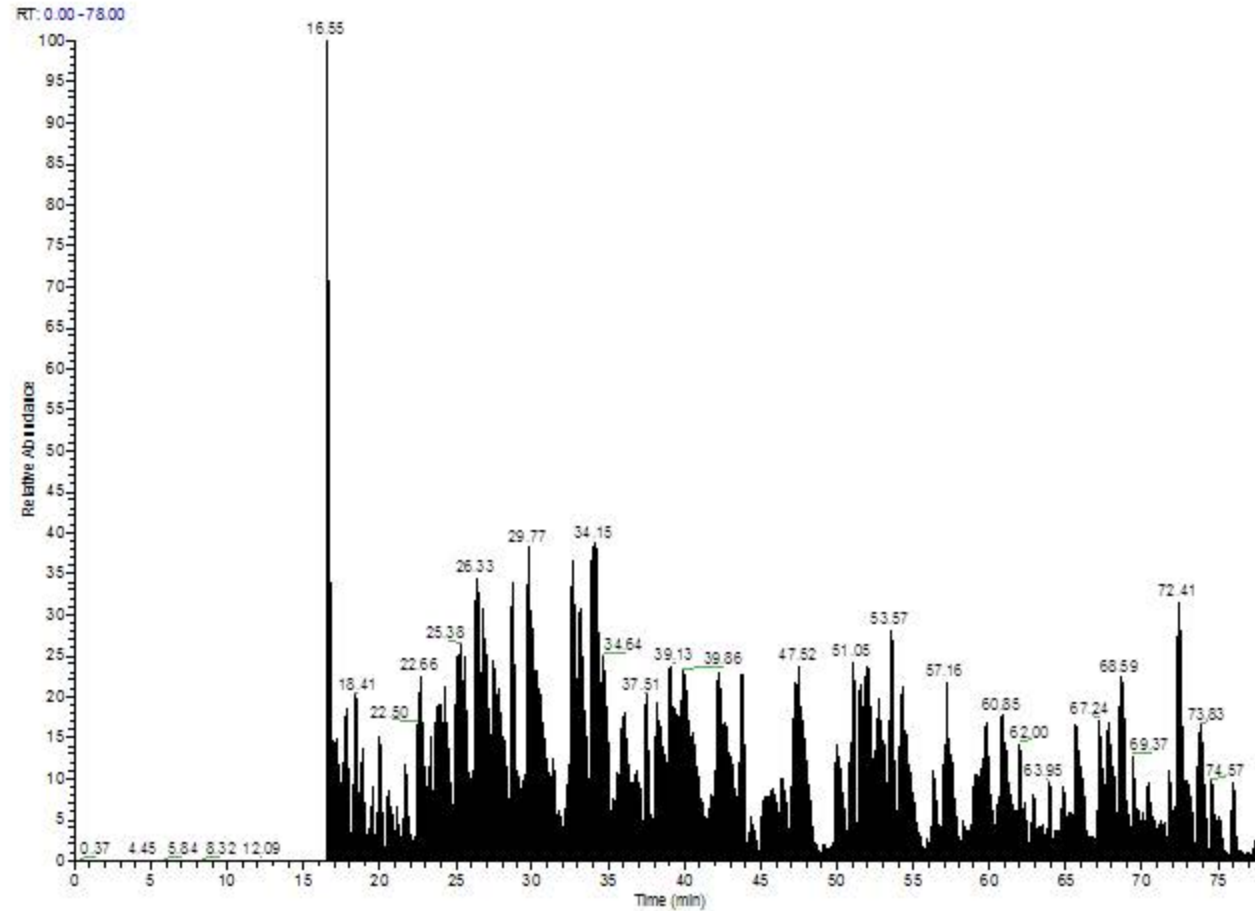

Supplement: s1 [file s1]

# Pat.3 paracancerous tissues, anti-IgG

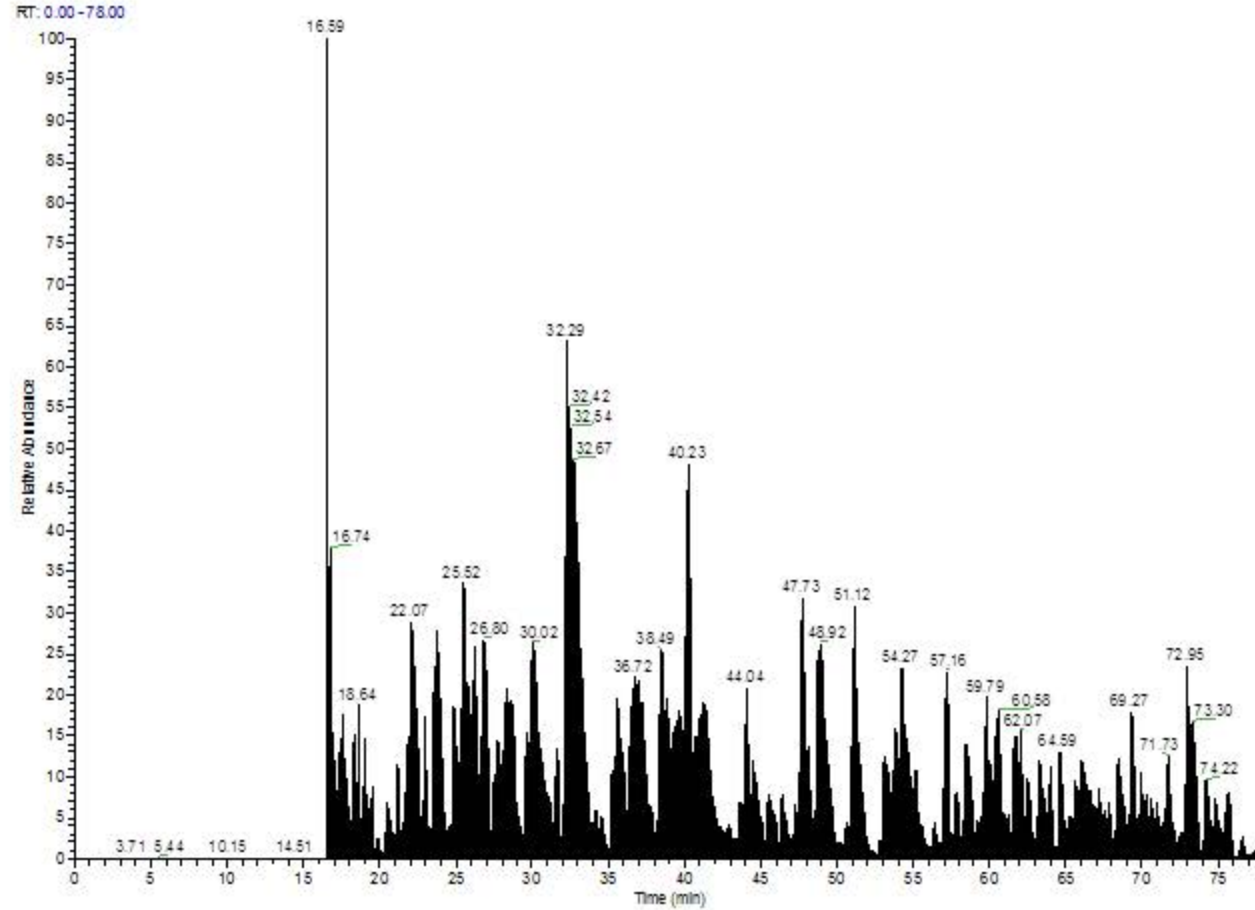

Supplement: s1 [file s1]

# Pat.1 HCC tissue, anti-AHNAK

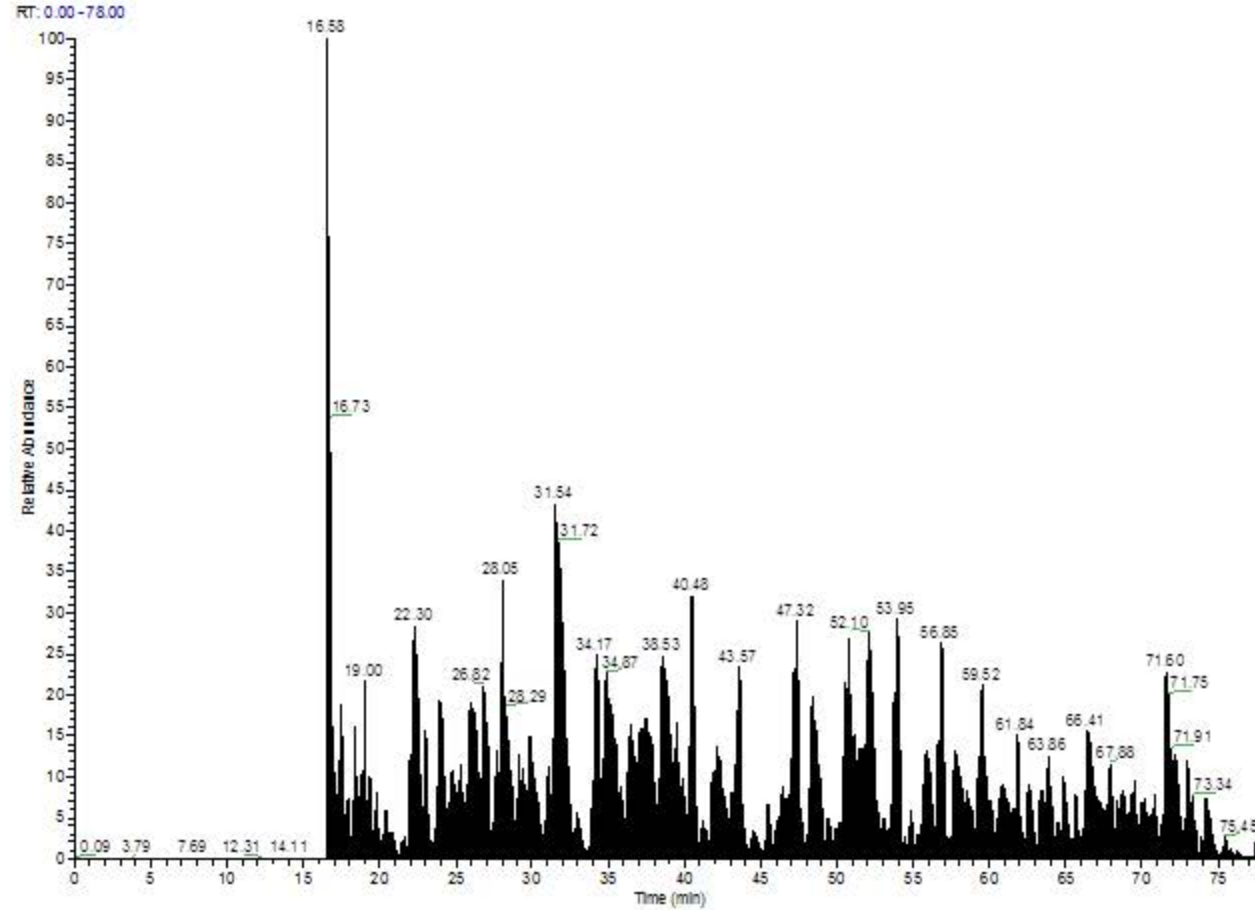

Supplement: s1 [file s1]

# Pat.1 paracancerous tissues, anti-IgG

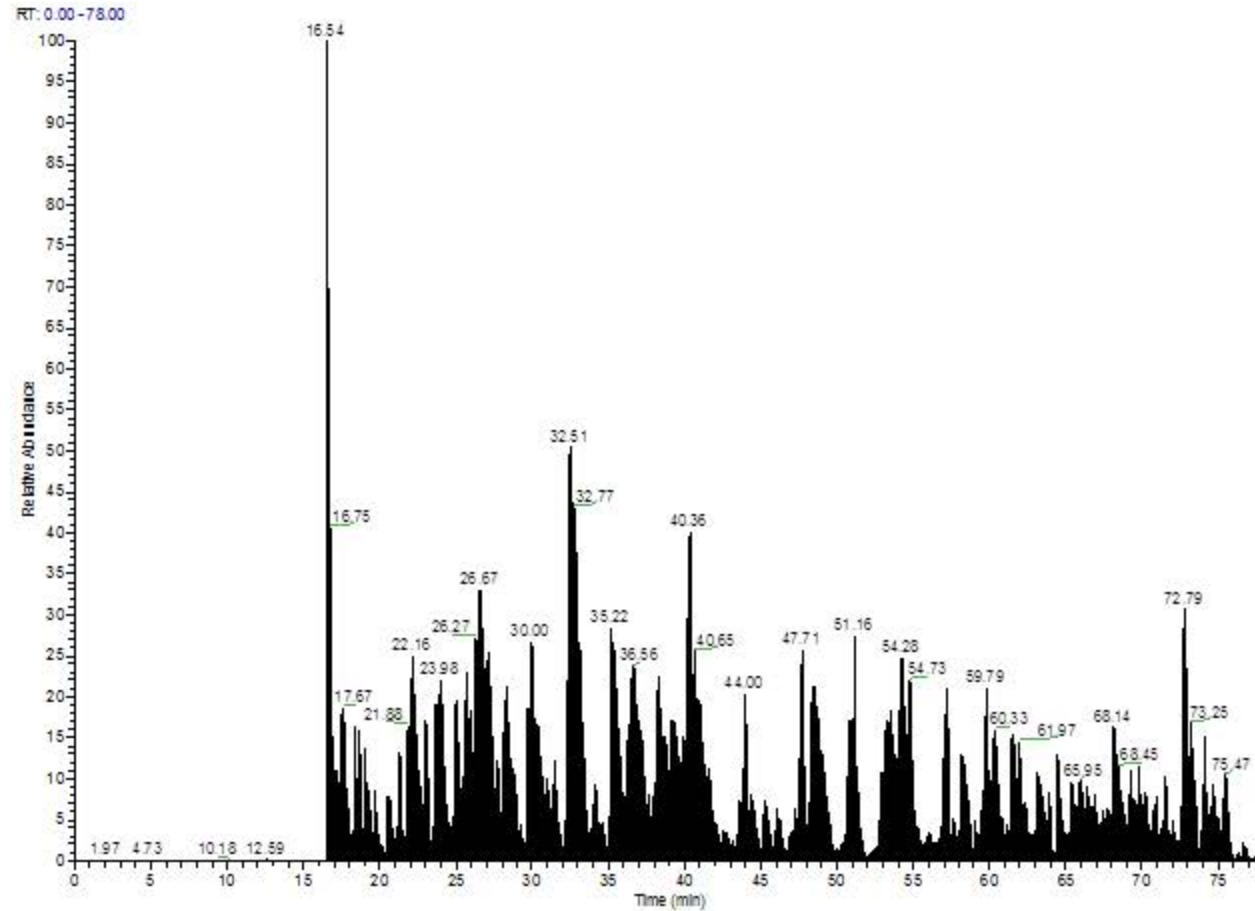

Supplement: s1 [file s1]
